# Supplementary material
Source: ML conference proceedings conference paper supplement (https://openaccess.thecvf.com/content/CVPR_2019/html/Li_3D_Appearance_Super-Resolution_CVPR_2019_paper.html)
Supplement: Supplementary file 1 [file Li_3D_Appearance_Super-Resolution_CVPR_2019_supplemental.pdf]

# 3D Appearance Super-Resolution with Deep Learning: Supplementary Material

Yawei Li<sup>1</sup>, Vagia Tsiminaki<sup>2</sup>, Radu Timofte<sup>1</sup>, Marc Pollefeys<sup>2,3</sup>, and Luc van Gool<sup>1</sup>

<sup>1</sup>Computer Vision Lab, ETH Zurich, Switzerland

{yawei.li, radu.timofte, vangool}@vision.ee.ethz.ch

<sup>2</sup>Computer Vision and Geometry Group, ETH Zurich, Switzerland <sup>3</sup>Microsoft, USA

{vagia.tsiminaki, marc.pollefeys}@inf.ethz.ch

## 1. Details of the Provided Dataset

### 1.1. Mesh, images, and projection matrices

The provided dataset has 24 different scenes in total including 13 from ETH3D, 6 from Collection, 3 from SyB3R, and 2 from Middlebury. Each scene contains a 3D mesh, multi-view images, and the corresponding projection matrices. The details of those scenes are provided in Table 1 including the mesh size, the number of vertices and faces in the mesh, the resolution of the HR images, and the number of views in the scene. It is shown in Table 1 that the scenes have different complexities,

Table 1: Details of the each of the scenes in the provided dataset including the size (MB) of the mesh, number of vertices and faces (k) in the mesh, the resolution of HR images, and the number of views in each scene.

| Dataset    | Scene                   | Mesh      |              |           | Image       |           |
|------------|-------------------------|-----------|--------------|-----------|-------------|-----------|
|            |                         | Mesh size | No. vertices | No. Faces | Resolution  | No. Views |
| ETH3D      | <i>courtyard</i>        | 136.0     | 646          | 1,168     | 3096 × 2064 | 38        |
|            | <i>delivery_area</i>    | 100.1     | 511          | 911       | 3096 × 2064 | 44        |
|            | <i>electro</i>          | 32.7      | 164          | 293       | 3084 × 2052 | 45        |
|            | <i>facade</i>           | 121.5     | 583          | 1,026     | 3096 × 2052 | 46        |
|            | <i>kicker</i>           | 116.1     | 571          | 1,004     | 3096 × 2064 | 31        |
|            | <i>meadow</i>           | 32.0      | 156          | 282       | 3096 × 2064 | 15        |
|            | <i>office</i>           | 194.1     | 882          | 1,663     | 3108 × 2064 | 26        |
|            | <i>pipes</i>            | 171.3     | 850          | 1,502     | 3108 × 2064 | 14        |
|            | <i>playground</i>       | 44.8      | 233          | 367       | 3096 × 2064 | 38        |
|            | <i>relief</i>           | 36.7      | 186          | 324       | 3096 × 2064 | 31        |
|            | <i>relief_2</i>         | 58.5      | 299          | 519       | 3096 × 2064 | 31        |
|            | <i>terrace</i>          | 52.0      | 327          | 421       | 3096 × 2064 | 23        |
|            | <i>terrains</i>         | 55.5      | 265          | 495       | 3096 × 2064 | 42        |
| Collection | <i>Beethoven</i>        | 16.0      | 74           | 144       | 1024 × 768  | 33        |
|            | <i>Bird</i>             | 16.7      | 78           | 150       | 1024 × 768  | 20        |
|            | <i>Buddha</i>           | 16.5      | 75           | 150       | 1404 × 936  | 91        |
|            | <i>Bunny</i>            | 12.3      | 57           | 111       | 1024 × 768  | 36        |
|            | <i>Fountain</i>         | 40.4      | 200          | 399       | 1280 × 1024 | 55        |
|            | <i>Relief</i>           | 47.6      | 233          | 464       | 1280 × 1024 | 40        |
| Middlebury | <i>DinoRing</i>         | 143.2     | 619          | 1,237     | 640 × 480   | 48        |
|            | <i>TempleRing</i>       | 85.2      | 369          | 737       | 640 × 480   | 47        |
| SyB3R      | <i>GeologicalSample</i> | 14.7      | 98           | 197       | 3888 × 2592 | 14        |
|            | <i>Skull</i>            | 2.8       | 19           | 38        | 3888 × 2592 | 14        |
|            | <i>Toad</i>             | 77        | 481          | 962       | 3888 × 2592 | 14        |

i.e., different mesh size and number of vertices and faces.

## 1.2. Texture maps

Twelve of the 24 texture maps for different resolutions (HR,  $\times 2$ ,  $\times 3$ ,  $\times 4$  down-sampling) are shown in Fig. 1, Fig. 2, and Fig. 3, respectively. By comparing the texture maps with different resolutions, we find that the ground truth texture maps contain more details than the LR ones. In addition, the HR texture maps are denser than the LR ones. Since optimal UV parameters exist for the synthetic scenes *GeologicalSample*, *Toad*, and *Skull*, their texture maps have less disconnected support regions.

## 2. SR Results

In Table 2 and Table 3, we show the PSNR and SSIM results of different methods. Apart from the methods in the main paper, the results of FSRCNN [2], SRResNet [3], and RCAN [4] are also provided. For FSRCNN, the pre-trained models provided by the authors are directly used. SRResNet, EDSR, and RCAN are trained on DIV2K [1]. More visual results of *relief*, *facade*, *Buddha*, and *Fountain* for different methods are shown in Fig. 4, Fig. 5, Fig. 6, and Fig. 7, respectively.

Table 2: The PSNR results of different methods for scaling factor  $\times 2$ ,  $\times 3$ , and  $\times 4$ .

| Method   | ETH3D      |            |            | Collection |            |            | Middlebury |            |            | SyB3R      |            |            | Average    |            |            |
|----------|------------|------------|------------|------------|------------|------------|------------|------------|------------|------------|------------|------------|------------|------------|------------|
|          | $\times 2$ | $\times 3$ | $\times 4$ | $\times 2$ | $\times 3$ | $\times 4$ | $\times 2$ | $\times 3$ | $\times 4$ | $\times 2$ | $\times 3$ | $\times 4$ | $\times 2$ | $\times 3$ | $\times 4$ |
| Nearest  | 19.06      | 16.71      | 14.68      | 24.22      | 19.7       | 16.92      | 10.08      | 7.93       | 7.08       | 30.84      | 27.88      | 25.82      | 21.07      | 18.12      | 16.0       |
| Bilinear | 20.61      | 18.24      | 16.32      | 26.2       | 21.48      | 18.84      | 11.87      | 8.88       | 7.77       | 31.75      | 28.83      | 26.9       | 22.67      | 19.6       | 17.56      |
| Bicubic  | 20.21      | 17.96      | 15.88      | 25.67      | 21.12      | 18.29      | 11.32      | 8.81       | 7.73       | 31.77      | 28.78      | 26.73      | 22.28      | 19.34      | 17.16      |
| Lanczos  | 20.01      | 17.74      | 15.69      | 25.42      | 20.86      | 18.07      | 11.14      | 8.81       | 7.81       | 31.71      | 28.7       | 26.63      | 22.09      | 19.15      | 17.0       |
| HRST     | 16.18      | –          | 16.12      | 32.29      | –          | 29.63      | 22.13      | –          | 20.88      | 27.9       | –          | 26.34      | 22.17      | –          | 21.17      |
| HRST+    | –          | –          | –          | 32.24      | –          | 29.9       | 22.76      | –          | 21.55      | –          | –          | –          | –          | –          | –          |
| FSRCNN   | 18.09      | 15.02      | 13.75      | 23.58      | 18.16      | 16.36      | 9.62       | 7.73       | 7.43       | 30.23      | 26.35      | 25.01      | 20.27      | 16.61      | 15.29      |
| SRRESNET | 17.61      | 14.89      | 12.83      | 22.99      | 18.1       | 15.22      | 8.92       | 6.98       | 6.5        | 30.04      | 26.88      | 24.52      | 19.79      | 16.53      | 14.36      |
| EDSR     | 16.75      | 14.08      | 12.03      | 21.77      | 17.2       | 14.24      | 8.49       | 7.13       | 6.61       | 29.31      | 26.18      | 23.81      | 18.89      | 15.79      | 13.61      |
| RCAN     | 16.32      | 13.62      | 11.55      | 21.6       | 16.73      | 13.91      | 8.4        | 7.05       | 6.54       | 29.11      | 25.86      | 23.5       | 18.58      | 15.38      | 13.22      |
| EDSR+    | 21.13      | 19.75      | 18.44      | 28.25      | 25.53      | 24.19      | 12.73      | 11.21      | 9.9        | 32.78      | 29.9       | 28.31      | 23.66      | 21.75      | 20.4       |
| NLR-     | 21.21      | 20.11      | 19.2       | 28.08      | 25.0       | 23.27      | 14.68      | 12.37      | 11.11      | 32.18      | 28.84      | 26.64      | 23.75      | 21.78      | 20.47      |
| NLR      | 21.31      | 20.27      | 19.18      | 28.38      | 25.85      | 24.84      | 13.67      | 12.92      | 12.29      | 32.57      | 29.57      | 27.67      | 23.85      | 22.22      | 21.08      |
| NHR      | 25.19      | 23.95      | 22.7       | 30.25      | 28.41      | 26.27      | 17.16      | 17.21      | 15.63      | 30.57      | 27.42      | 24.39      | 26.46      | 24.94      | 23.22      |

Table 3: The SSIM results of different methods for scaling factor  $\times 2$ ,  $\times 3$ , and  $\times 4$ .

| Method   | ETH3D      |            |            | Collection |            |            | Middlebury |            |            | SyB3R      |            |            | Average    |            |            |
|----------|------------|------------|------------|------------|------------|------------|------------|------------|------------|------------|------------|------------|------------|------------|------------|
|          | $\times 2$ | $\times 3$ | $\times 4$ | $\times 2$ | $\times 3$ | $\times 4$ | $\times 2$ | $\times 3$ | $\times 4$ | $\times 2$ | $\times 3$ | $\times 4$ | $\times 2$ | $\times 3$ | $\times 4$ |
| Nearest  | 0.81       | 0.74       | 0.68       | 0.88       | 0.77       | 0.7        | 0.54       | 0.43       | 0.39       | 0.91       | 0.84       | 0.79       | 0.82       | 0.74       | 0.67       |
| Bilinear | 0.83       | 0.77       | 0.71       | 0.91       | 0.81       | 0.75       | 0.57       | 0.45       | 0.41       | 0.92       | 0.86       | 0.81       | 0.84       | 0.77       | 0.71       |
| Bicubic  | 0.83       | 0.76       | 0.7        | 0.9        | 0.8        | 0.73       | 0.56       | 0.45       | 0.41       | 0.92       | 0.86       | 0.81       | 0.84       | 0.76       | 0.7        |
| Lanczos  | 0.82       | 0.75       | 0.68       | 0.9        | 0.79       | 0.71       | 0.55       | 0.45       | 0.4        | 0.92       | 0.86       | 0.81       | 0.83       | 0.75       | 0.68       |
| HRST     | 0.67       | –          | 0.66       | 0.96       | –          | 0.93       | 0.92       | –          | 0.9        | 0.88       | –          | 0.82       | 0.79       | –          | 0.77       |
| HRST+    | –          | –          | –          | 0.95       | –          | 0.92       | 0.91       | –          | 0.89       | –          | –          | –          | –          | –          | –          |
| FSRCNN   | 0.77       | 0.66       | 0.61       | 0.85       | 0.7        | 0.64       | 0.49       | 0.37       | 0.36       | 0.9        | 0.81       | 0.77       | 0.78       | 0.66       | 0.61       |
| SRRESNET | 0.78       | 0.7        | 0.63       | 0.86       | 0.74       | 0.66       | 0.5        | 0.41       | 0.38       | 0.91       | 0.84       | 0.78       | 0.79       | 0.7        | 0.64       |
| EDSR     | 0.76       | 0.67       | 0.6        | 0.82       | 0.71       | 0.64       | 0.49       | 0.41       | 0.37       | 0.91       | 0.83       | 0.77       | 0.77       | 0.68       | 0.61       |
| RCAN     | 0.75       | 0.66       | 0.58       | 0.84       | 0.7        | 0.63       | 0.49       | 0.4        | 0.37       | 0.9        | 0.83       | 0.77       | 0.77       | 0.67       | 0.6        |
| EDSR+    | 0.86       | 0.83       | 0.79       | 0.94       | 0.91       | 0.88       | 0.62       | 0.51       | 0.45       | 0.93       | 0.88       | 0.84       | 0.87       | 0.83       | 0.79       |
| NLR-     | 0.86       | 0.82       | 0.74       | 0.93       | 0.89       | 0.85       | 0.66       | 0.51       | 0.42       | 0.93       | 0.86       | 0.82       | 0.87       | 0.82       | 0.75       |
| NLR      | 0.86       | 0.83       | 0.8        | 0.94       | 0.91       | 0.89       | 0.65       | 0.58       | 0.54       | 0.93       | 0.87       | 0.83       | 0.87       | 0.83       | 0.8        |
| NHR      | 0.84       | 0.89       | 0.84       | 0.87       | 0.93       | 0.85       | 0.74       | 0.77       | 0.72       | 0.82       | 0.85       | 0.72       | 0.84       | 0.88       | 0.82       |

## References

- [1] E. Agustsson and R. Timofte. NTIRE 2017 challenge on single image super-resolution: Dataset and study. In *Proc. CVPRW*, July 2017. 2
- [2] C. Dong, C. C. Loy, and X. Tang. Accelerating the super-resolution convolutional neural network. In *ECCV*, pages 391–407. Springer, 2016. 2

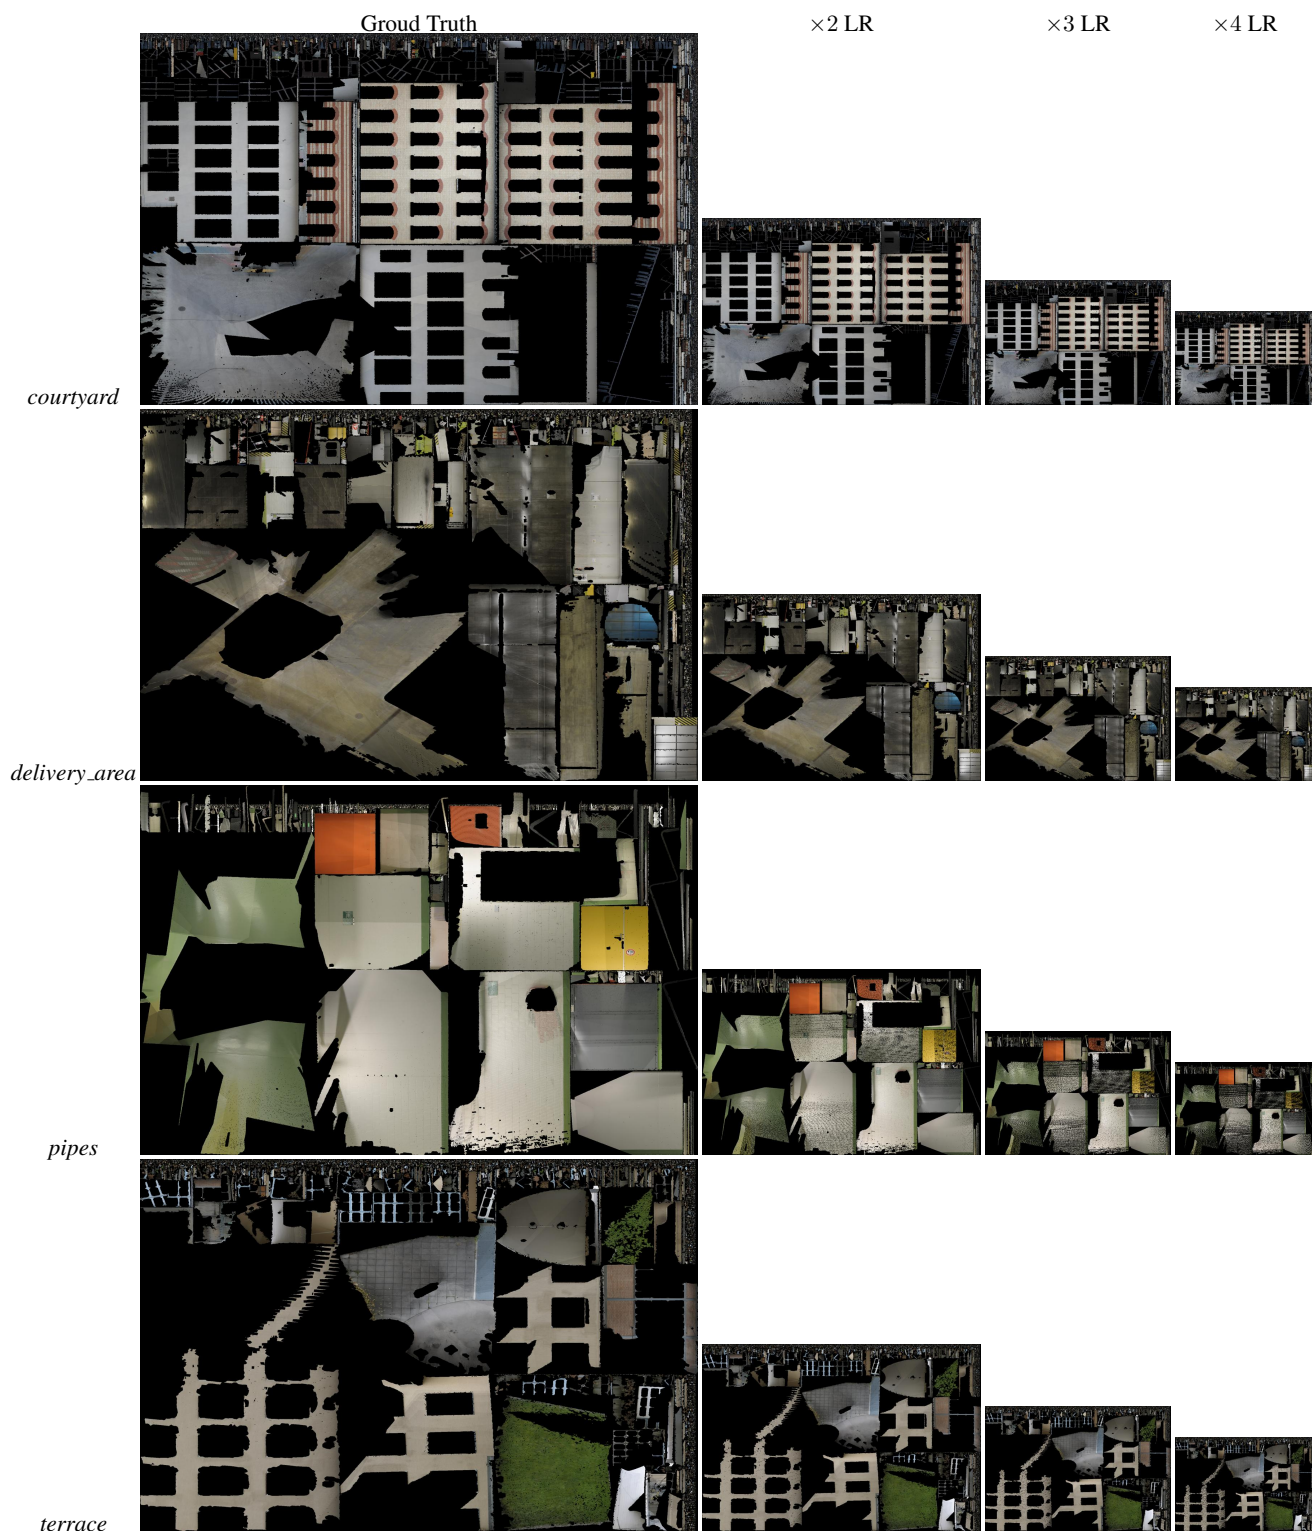

Figure 1: The texture maps of *courtyard*, *delivery\_area*, *pipes*, and *terrace* for different resolutions.

- [3] C. Ledig, L. Theis, F. Huszár, J. Caballero, A. Cunningham, A. Acosta, A. P. Aitken, A. Tejani, J. Totz, Z. Wang, et al. Photo-realistic single image super-resolution using a generative adversarial network. In *Proc. CVPR*, volume 2, page 4, 2017. 2



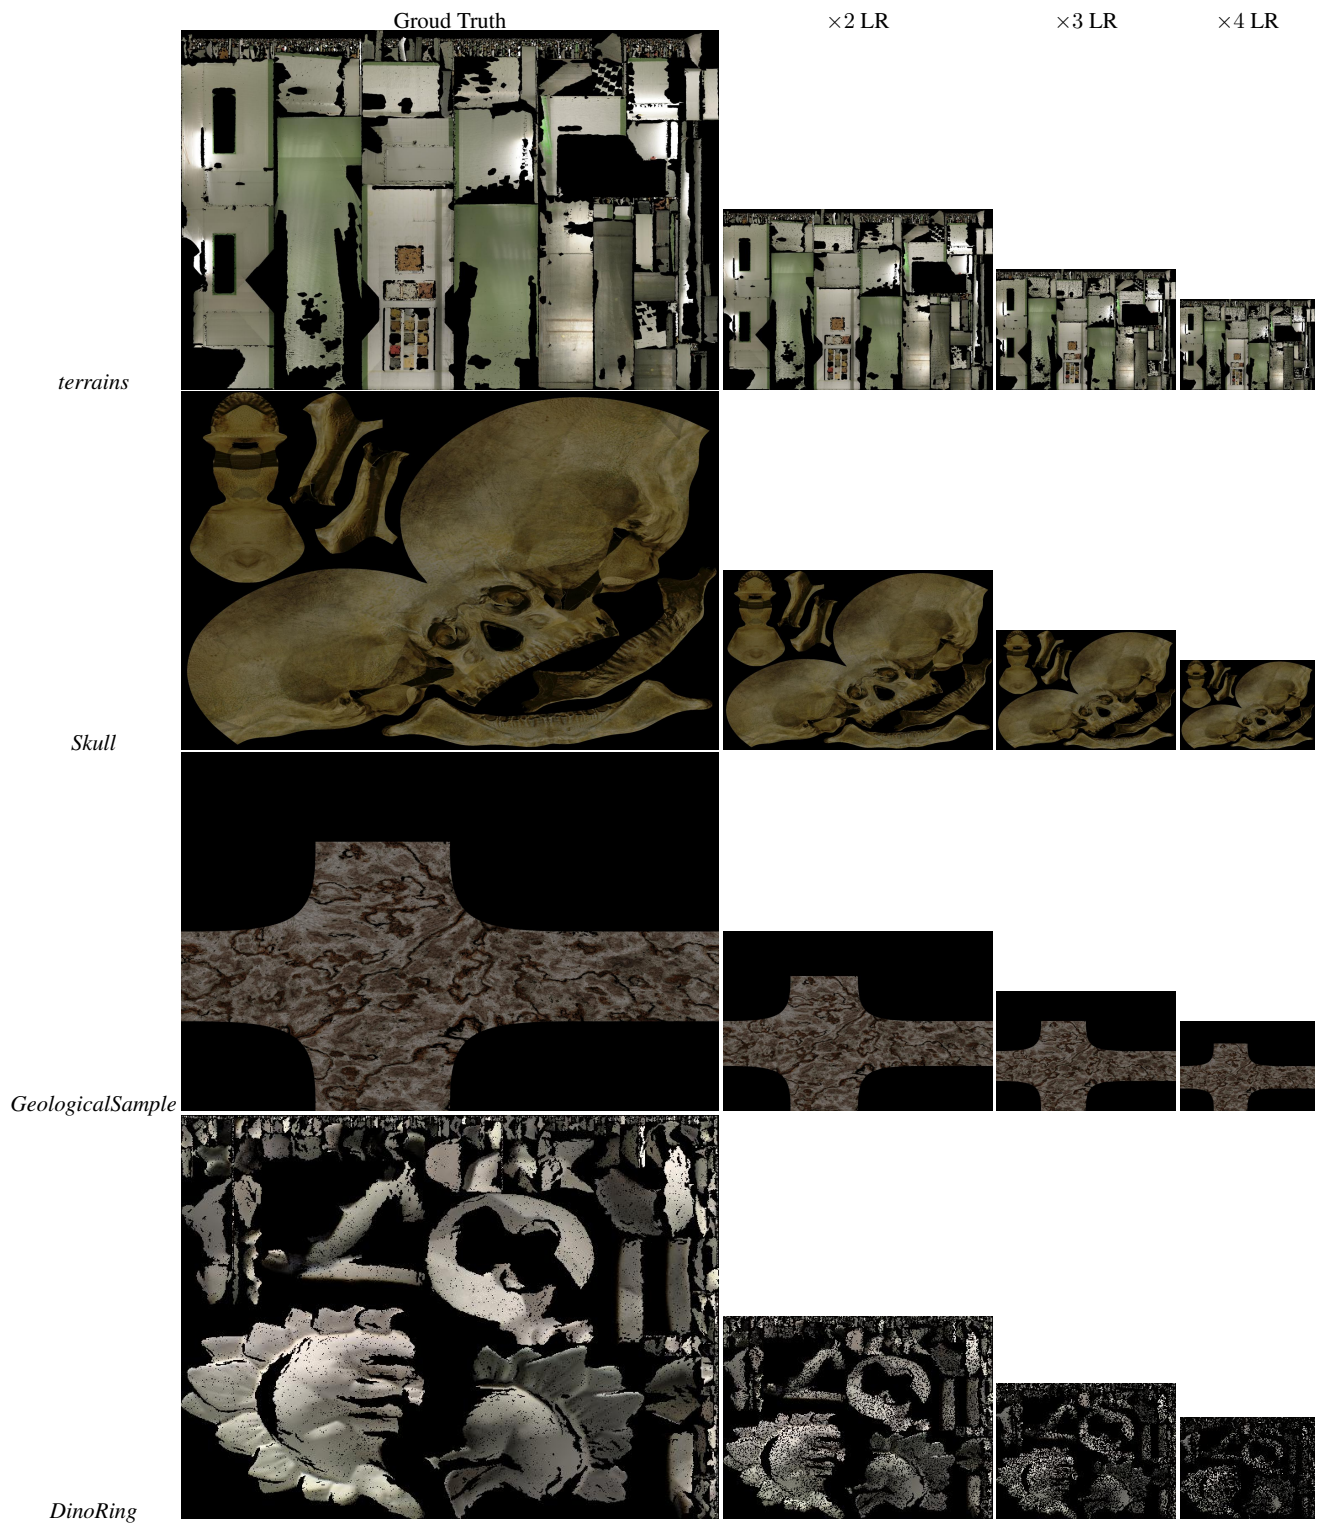

Figure 2: The texture maps of *terrains*, *Skull*, *GeologicalSample*, and *DinoRing* for different resolutions.

- [4] Y. Zhang, K. Li, K. Li, L. Wang, B. Zhong, and Y. Fu. Image super-resolution using very deep residual channel attention networks. In *Proc. ECCV*, pages 286–301, 2018. 2

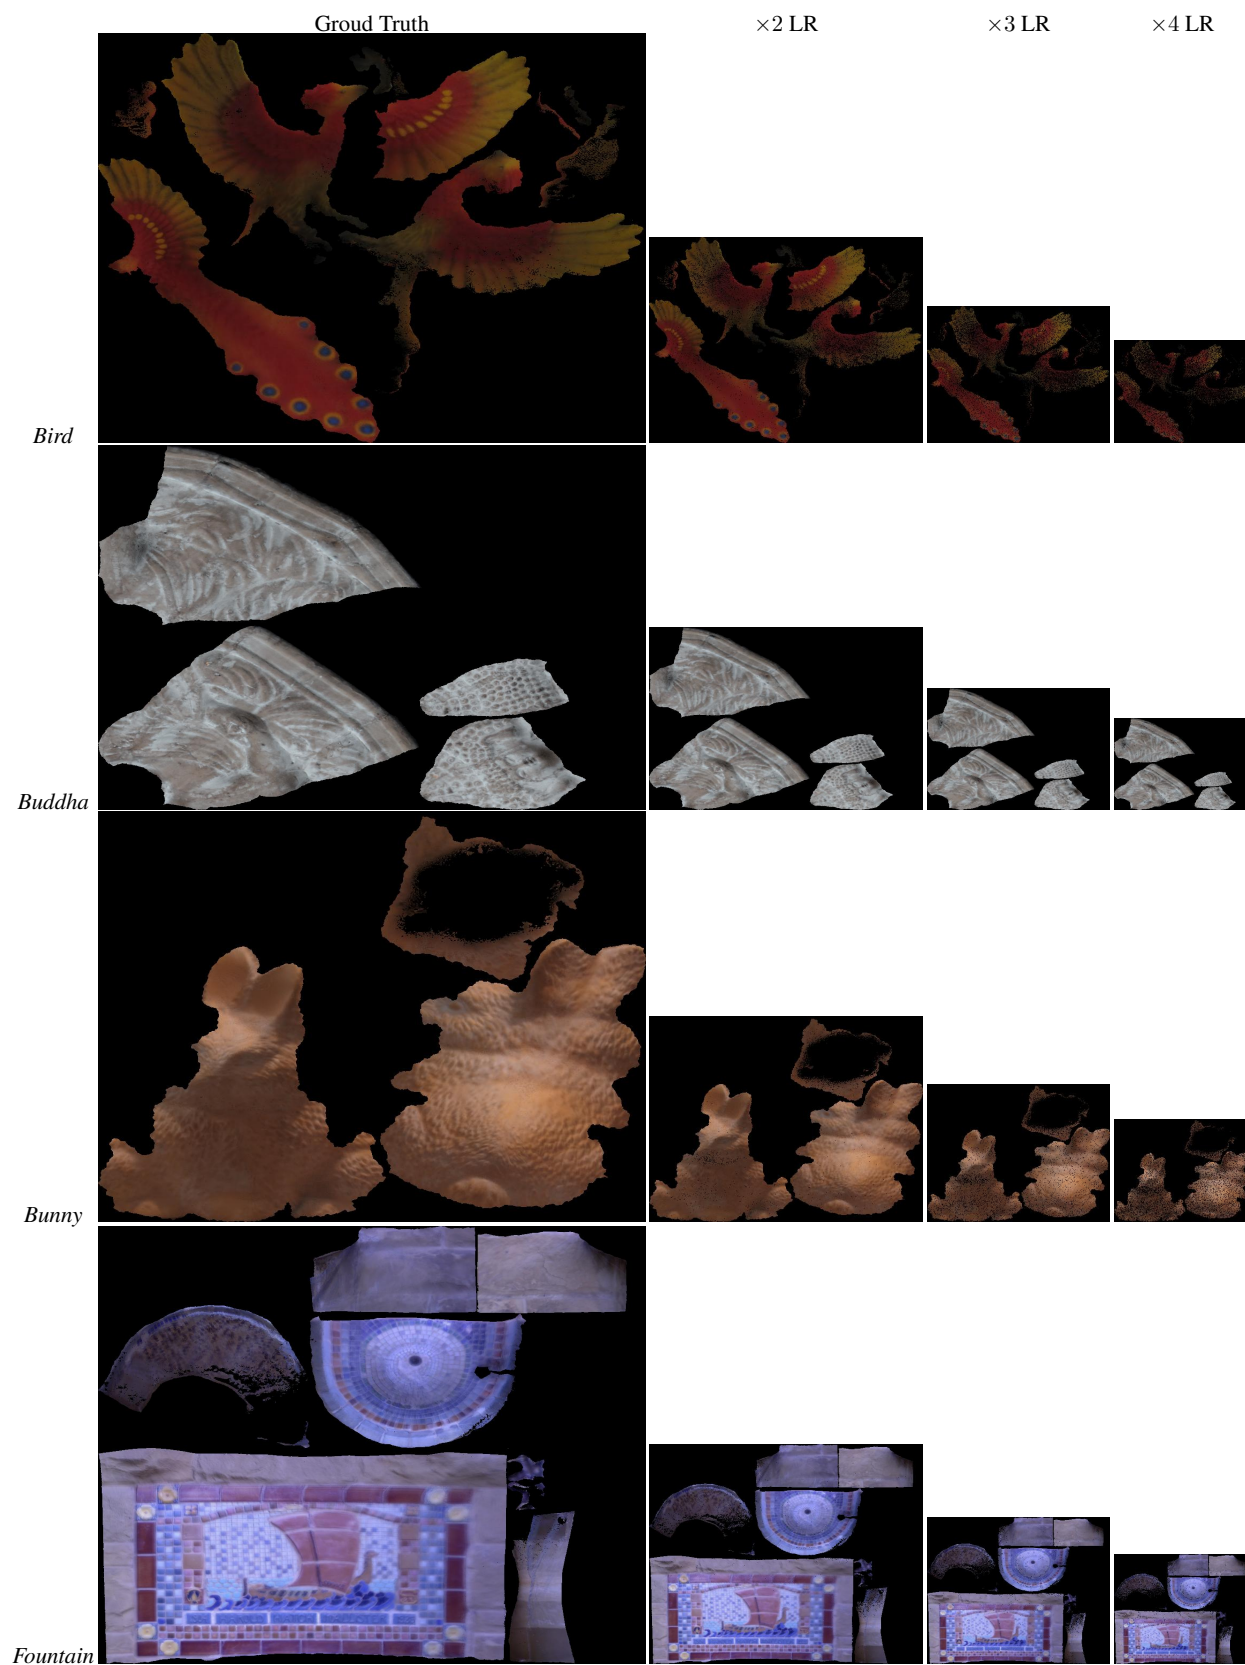

Figure 3: The texture maps of *Bird*, *Buddha*, *Bunny*, and *Fountain* for different resolutions.



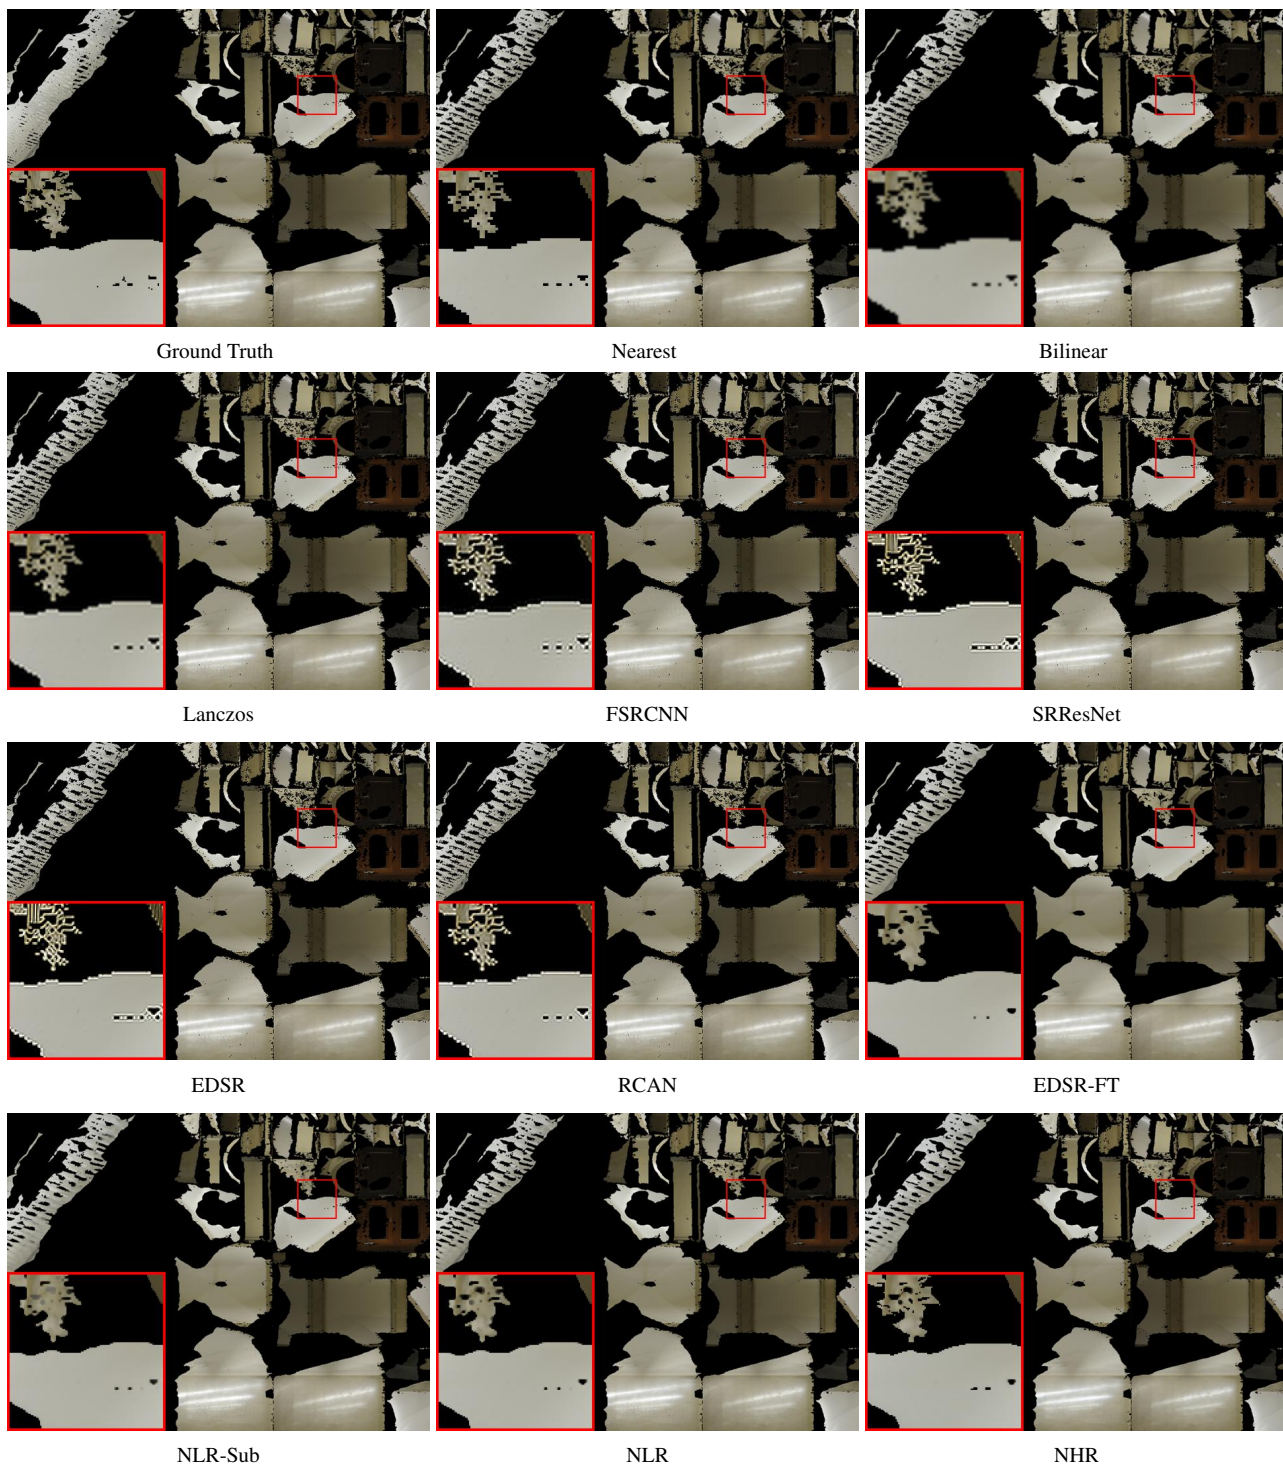

Figure 4: Texture map SR results of *relief* by different methods.

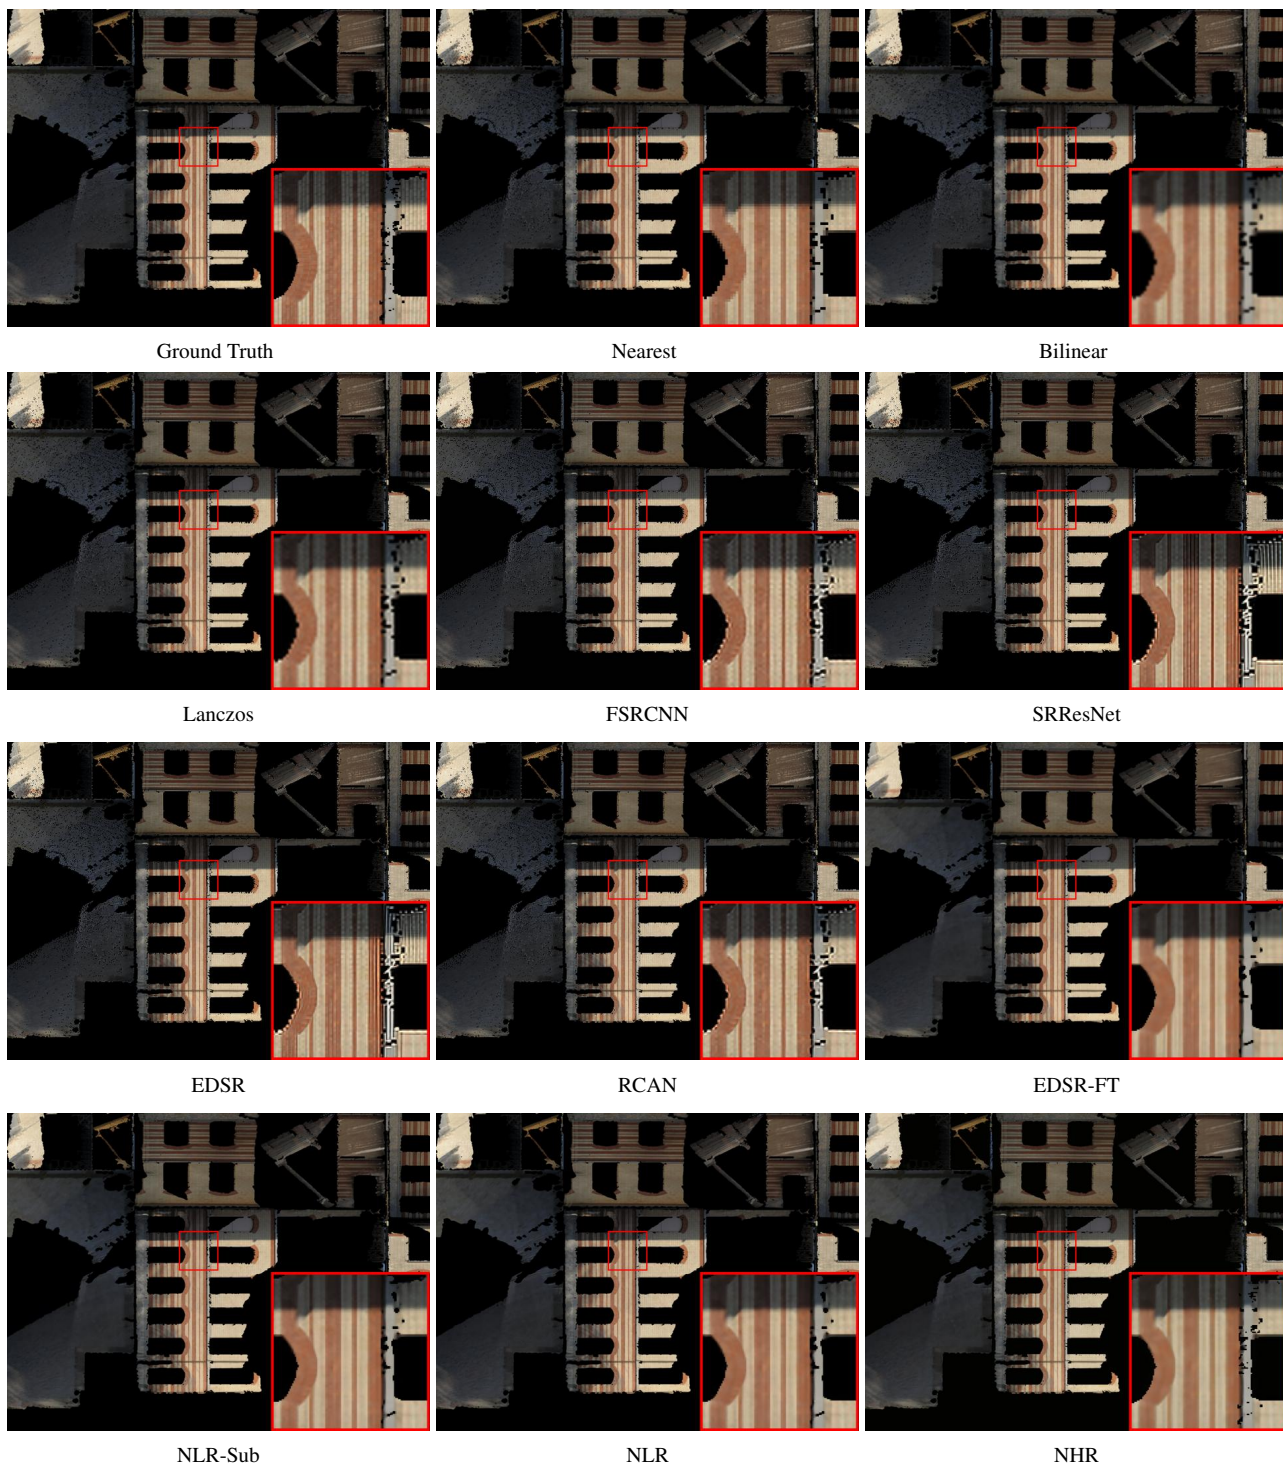

Figure 5: Texture map SR results of *facade* by different methods.



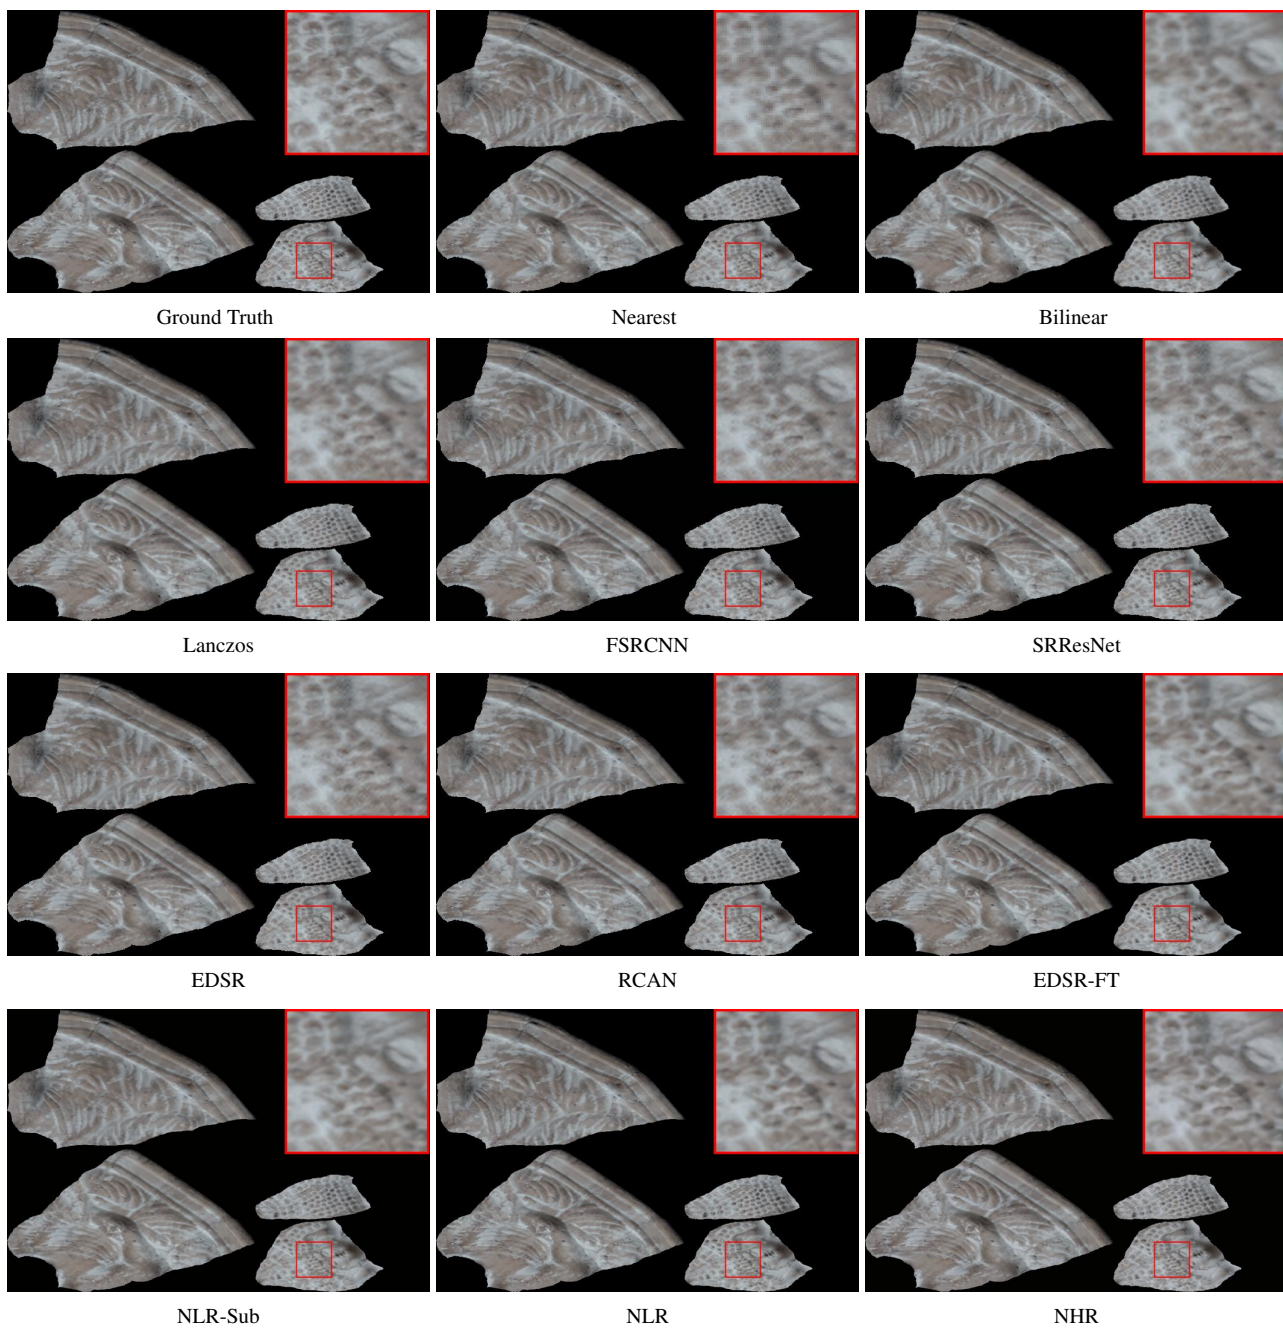

Figure 6: Texture map SR results of *Buddha* by different methods.



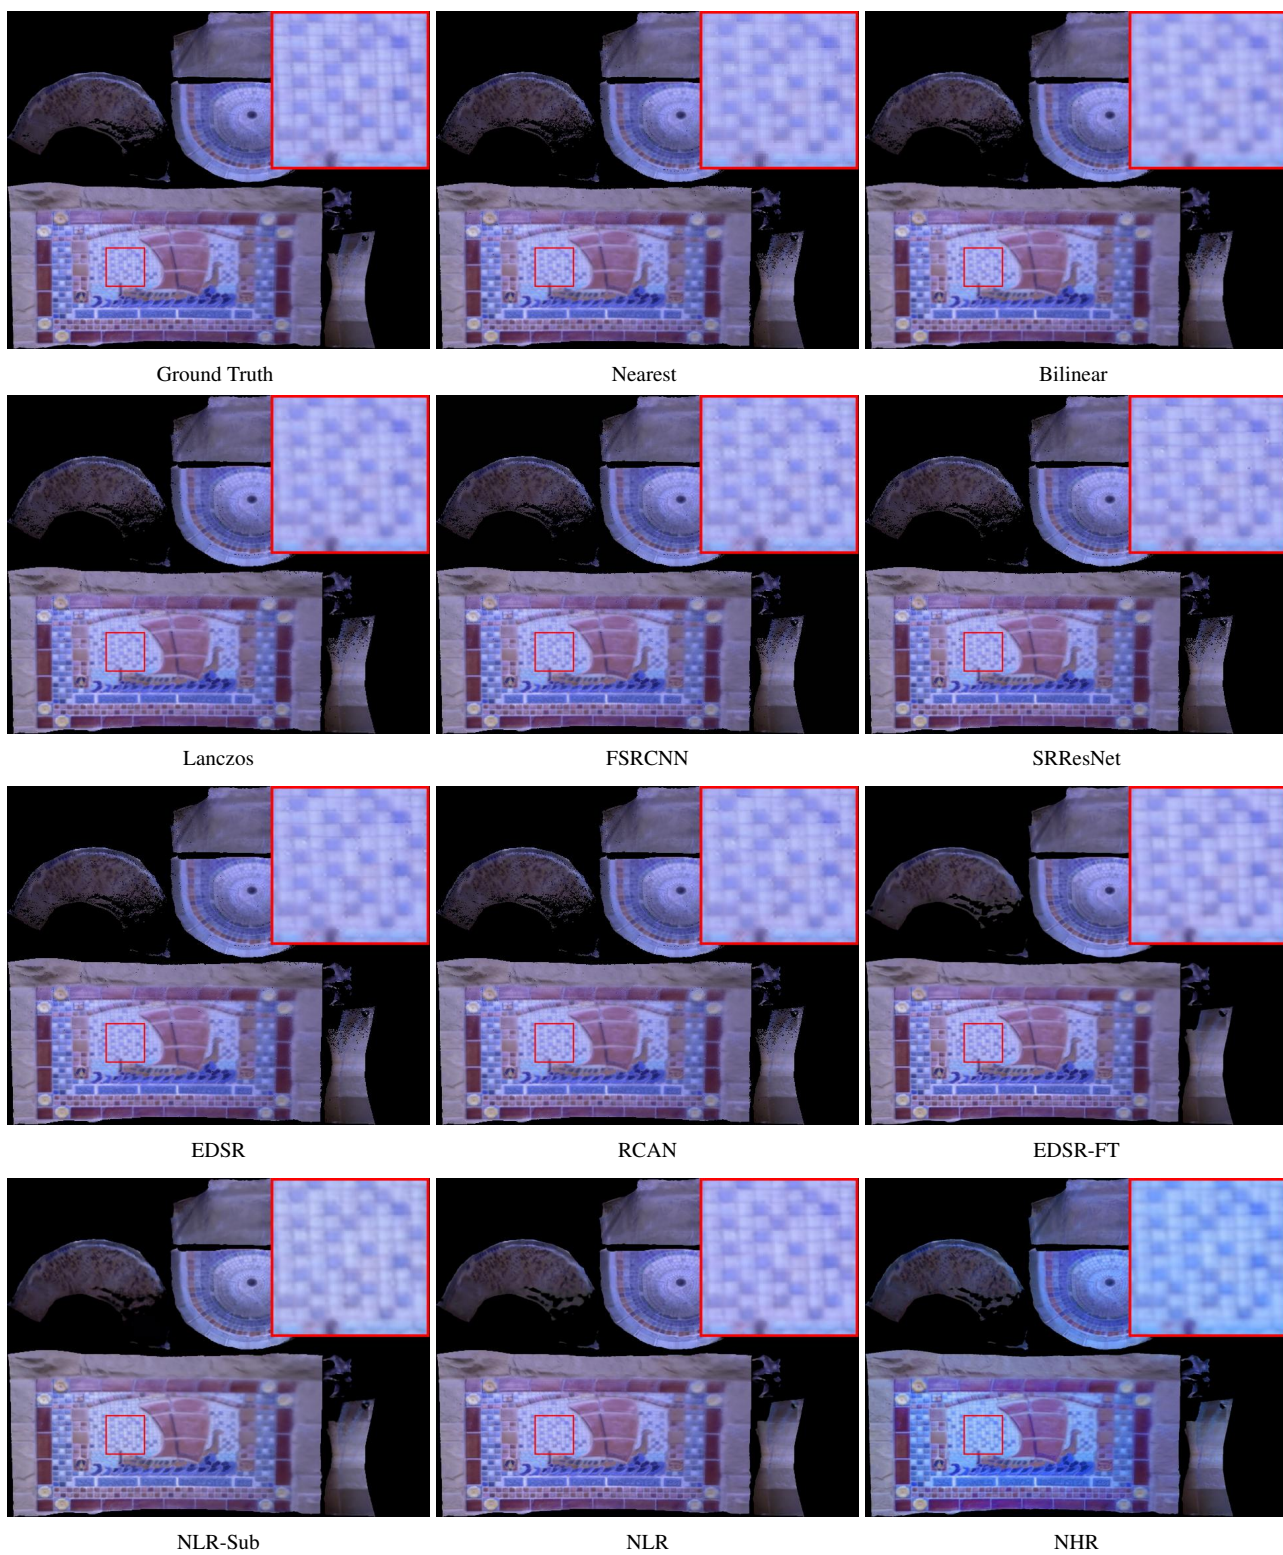

Figure 7: Texture map SR results of *Fountain* by different methods.
